# Supplementary material for: A low molecular weight OLED material: 2-(4-((2-hydroxyethyl)(methyl)amino)benzylidene)malononitrile. Synthesis, crystal structure, thin film morphology, spectroscopic characterization and DFT calculations
Source: Royal Society of Chemistry journal article supplement (doi:10.1039/c9ra05425a), 2019-01-01
Supplement: c9ra05425a1.pdf [file c9ra05425a1.pdf]

## Supporting Information

### **A low molecular weight OLED material: 2-(4-((2-hydroxyethyl)(methyl)amino)benzylidene)malononitrile. Synthesis, crystal structure, thin film morphology, spectroscopic characterization and DFT calculations**

M. Judith Percino,<sup>\*a</sup> Margarita Cerón,<sup>a</sup> Perumal Venkatesan,<sup>a</sup> Enrique Pérez-Gutiérrez,<sup>a</sup> Pilar Santos,<sup>a</sup> Paulina Ceballos,<sup>a</sup> Armando E. Castillo,<sup>a</sup> Paola Gordillo-Guerra,<sup>a</sup> Karnambaram Anandhan,<sup>a</sup> Oracio Barbosa-García,<sup>b</sup> Wilson Bernal<sup>b</sup> and Subbiah Thamocharan<sup>c</sup>

<sup>a</sup> *Unidad de Polímeros y Electrónica Orgánica, ICUAP, Benemérita Universidad Autónoma de Puebla, Val 3-Ecocampus Valsequillo, Independencia O2 Sur 50, San Pedro Zacachimalpa, Pue., México. 7296. E-mail: judith.percino@correo.buap.mx*

<sup>b</sup> *Centro de Investigaciones en Óptica A. P. 1-948, 37150, León Guanajuato, México*

<sup>c</sup> *Biomolecular Crystallography Laboratory, Department of Bioinformatics, School of Chemical and Biotechnology, SASTRA Deemed University, Thanjavur 613 401, India*

#### Table of Contents

|                                                                                            |    |
|--------------------------------------------------------------------------------------------|----|
| Synthesis of 4-((2-hydroxyethyl)(methyl)amino)benzaldehyde [HEMAB]                         | S2 |
| Synthesis of 2-(4-((2-hydroxyethyl)(methyl)amino)benzylidene)malononitrile. [HEMABM]       | S2 |
| Table S1. Crystal data and refinement parameters for HEMABM                                | S4 |
| Table S2. Bond lengths (Å) for HEMABM                                                      | S5 |
| Table S3. Torsion angles (°) for HEMABM                                                    | S6 |
| Table S4. Optoelectronic properties for HEMABM                                             | S7 |
| Table S5. Second order perturbation theory analysis of Fock matrix in NBO basis for HEMABM | S8 |

## Synthesis of 4-((2-hydroxyethyl)(methyl)amino)benzaldehyde [HEMAB]

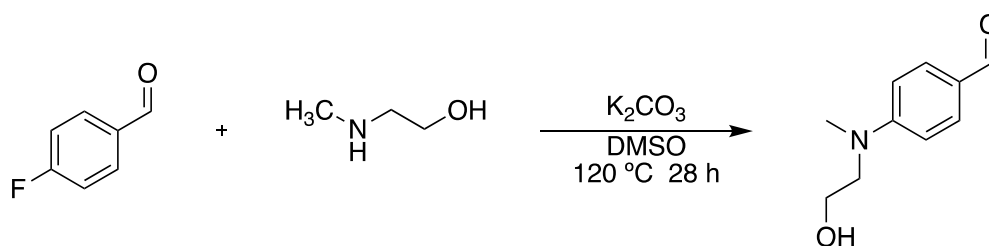

A mixture of 4-Fluorobenzaldehyde (500mg, 0.39mmol), *N*-methylethanolamine (600mg, 0.80mmol) and K<sub>2</sub>CO<sub>3</sub> (550mg, 0.40 mmol) was taken in DMSO (2 mL) and refluxed at 120 °C for 28 hours with constant stirring. The completion of the reaction was monitored by color change from transparent to light-yellow until to be dark orange. After the completion of the reaction, the crude production was cooled to rt, added water to it (50 mL). The crude product was extracted with ethyl acetate (2 x 20 mL). The organic layer was dried over anhydrous Na<sub>2</sub>SO<sub>4</sub>, filtered, and the evaporate the solvent. The precipitate was formed in a greater quantity and washed by cold EtOH (4 °C) until a yellow powder was obtained. The yellow powder was purified with a Hex:EtOAc mixture (3:1). The expected product yield obtained 96% as a yellow powder. M.p. 66-68 °C.

**FT-IR (KBr)**,  $\tilde{\nu}$  (cm<sup>-1</sup>) 3399 (ν<sub>O-H</sub>) (m), 2928 (ν<sub>as</sub>C-H<sub>CH<sub>2</sub></sub>) (m), 2874 (ν<sub>s</sub>C-H<sub>CH<sub>3</sub></sub>) (m), 2838 (ν<sub>C-H</sub>, <sub>CHO</sub>)(w), 1642 (ν<sub>C=O</sub>, <sub>-CHO</sub>) (s), 1433 (δ<sub>s</sub>C-H<sub>CH<sub>2</sub></sub>) (w), 1394 (δ<sub>as</sub>C-H<sub>CH<sub>3</sub></sub>)(m), 1313,1246, 1207 (ν<sub>C-N</sub>) (m), 1170 (ν<sub>C-C</sub>, Ar) (s) , 1054 (ν<sub>C-O<sub>H</sub></sub>) (m), 722 (p-C-H<sub>CH<sub>2</sub></sub>) (w). **<sup>1</sup>H NMR** (500 MHz, CDCl<sub>3</sub>, ppm), δ 3.14 (s, 3H-CH<sub>3</sub>), 3.64 (t, *J* = 5, 5 Hz, 2H, -CH<sub>2</sub>), 3.89 (t, *J* = 5, 10, 7.5 Hz, 2H, CH<sub>2</sub>H), 6.78 (d, *J* = 10 Hz, 2H, Ar), 7.72 (d, *J* = 5 Hz, 2H, -Ar), 9.71 (s, 1H, -CHO). **<sup>13</sup>C NMR** (125 MHz, CDCl<sub>3</sub>, ppm), δ 39.25 (-CH<sub>3</sub>), 54.36 (-CH<sub>2</sub>), 60.07 (-CH<sub>2</sub>), 111.17 (-Ar), 125.29 (-Ar), 132.18 (-ipso), 153.90 (ipso), 190.47 (CO). **MS**, *m/z* (*I<sub>r</sub>*/%) : 179 (62), 148 (100) (M<sup>+</sup>), 132 (47), 119 (20.5), 77 (27.4).

## Synthesis of 2-(4-((2-hydroxyethyl)(methyl)amino)benzylidene)malononitrile. [HEMABM]

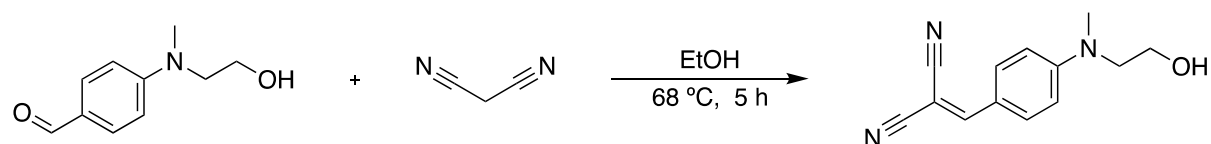

To ethanolic solution of **HEMAB** (0.201g in 3.8 mL ethanol, 1.11 mmol) was taken in the 25 mL two-neck round-bolted flask. The slowly add the ethanolic solution of malononitrile

(75 mg in 1.2 mL ethanol, 1.11 mmol) with constant stirring. Then reaction mixture was stirred for 5 hours at 68 °C. During the reaction period, the color of reaction was changed from orange, red to dark brown. After that the reaction mixture was concentrated to get viscous dark brown liquid, and it was washed with cyclohexane (2 mL) to get precipitate the product. The precipitate was filtered under vacuum and dried. Finally, the dark powder was recrystallized in toluene (12 mL), and washed with hexane (2 mL) to obtain an orange solid, the product was obtained in 69 % yield and with a m.p. of 102-104 °C.

**HEMABM.** FT-IR KBr ( $\nu/\text{cm}^{-1}$ ): 3480 ( $\nu\text{O-H}$ ), 2940 ( $\nu\text{C-H}$ ), 2216 ( $\nu\text{C}\equiv\text{N}$ ), 1608 ( $\nu\text{R}_1\text{R}_2\text{C}=\text{CHR}_3$ ), 1566, 1522 ( $\text{C}=\text{C}_a$ ), 1261, 1195 ( $\text{C-N}_t$ ), 1047 ( $\nu\text{C-O}_{\text{OH}}$ ), 823 ( $\delta\text{C-H}$ ). 500MHz,  $^1\text{H-NMR}$  ( $\text{CDCl}_3$  ppm): 7.83 (2H, d,  $J=10\text{Hz}$ , ArH), 7.48 (1H, s, =CH), 6.78 (2H, d,  $J=10\text{Hz}$ , ArH), 3.93-3.90 (2H, q,  $J=5\text{ Hz}$ , -CH<sub>2</sub>), 3.68 (2H, t,  $J=10\text{Hz}$ , -CH<sub>2</sub>), 3.20 (3H, s, -NCH<sub>3</sub>), 2.20 (1H, s, -OH). MS, m/z (I<sub>r</sub>/%) : [C<sub>13</sub>H<sub>13</sub>N<sub>3</sub>O] 227, [C<sub>13</sub>H<sub>12</sub>N<sub>3</sub>O<sup>+</sup>] 226 [C<sub>9</sub>H<sub>12</sub>NO<sup>+</sup>] 150, [C<sub>4</sub>HN<sub>2</sub><sup>+</sup>]77.

The adequate crystals for **SCXRD** were obtained by slow evaporation, 20-50 mg of [**HEMABM**] was dissolved in 5.0 mL of CHCl<sub>3</sub>, the solution was kept at 4 °C for 3 days until the appeared the single crystals orange color. Also, similar single crystals were obtained from the methanolic solution.

**Table S1.** Crystal data and refinement parameters for **HEMABM**

| <b>Parameters</b>                                                                                              | <b>HEMABM</b>                                    |
|----------------------------------------------------------------------------------------------------------------|--------------------------------------------------|
| Empirical formula                                                                                              | C <sub>13</sub> H <sub>13</sub> N <sub>3</sub> O |
| Color, habit                                                                                                   | orange, lath                                     |
| Formula weight                                                                                                 | 227.26                                           |
| Crystal system, space group                                                                                    | Monoclinic, <i>P2<sub>1</sub>/n</i>              |
| Temperature (K)                                                                                                | 110                                              |
| <i>a</i> , <i>b</i> , <i>c</i> (Å)                                                                             | 7.24645 (14), 17.8507 (4), 9.27013 (18)          |
| β (°)                                                                                                          | 92.1370 (16)                                     |
| <i>V</i> (Å <sup>3</sup> )                                                                                     | 1198.30 (4)                                      |
| <i>Z</i>                                                                                                       | 4                                                |
| Dc(g cm <sup>-3</sup> )                                                                                        |                                                  |
| Radiation type                                                                                                 | Cu Kα                                            |
| μ(mm <sup>-1</sup> )                                                                                           | 0.67                                             |
| Crystal size (mm)                                                                                              | 0.34 × 0.09 × 0.04                               |
| <i>T</i> <sub>min</sub> , <i>T</i> <sub>max</sub>                                                              | 0.857, 0.978                                     |
| No. of measured, independent and observed [ <i>I</i> > 2σ( <i>I</i> )] reflections                             | 7864, 2347, 1994                                 |
| <i>R</i> <sub>int</sub>                                                                                        | 0.023                                            |
| (sin θ <sub>max</sub> ) (Å <sup>-1</sup> )                                                                     | 0.616                                            |
| Refinement                                                                                                     |                                                  |
| <i>R</i> [ <i>F</i> <sup>2</sup> > 2σ( <i>F</i> <sup>2</sup> )], <i>wR</i> ( <i>F</i> <sup>2</sup> ), <i>S</i> | 0.034, 0.094, 1.02                               |
| No. of reflections                                                                                             | 2347                                             |
| No. of parameters                                                                                              | 307                                              |
| No. of restraints                                                                                              | 728                                              |
| H-atom treatment                                                                                               | H-atom parameters constrained                    |
| Δρ <sub>max</sub> , Δρ <sub>min</sub> (e Å <sup>-3</sup> )                                                     | 0.18, -0.13                                      |

**Table S2.** Bond lengths (Å) for **HEMABM**

| Bond          | Length (Å) |
|---------------|------------|
| N(1)-C(1)     | 1.138(7)   |
| c(1)-C(3)     | 1.418(6)   |
| N(2)-C(2)     | 1.156(7)   |
| C(2)-C(3)     | 1.430(6)   |
| C(3)-C(4)     | 1.373(6)   |
| C(4)-C(5)     | 1.430(7)   |
| C(5)-C(6)     | 1.414(7)   |
| C(5)-C(10)    | 1.418(7)   |
| C(6)-C(7)     | 1.371(7)   |
| C(7)-C(8)     | 1.415(4)   |
| C(8)-N(3)     | 1.402(6)   |
| C(8)-C(9)     | 1.423(6)   |
| C(9)-C(10)    | 1.372(7)   |
| N(3)-C(11)    | 1.455(6)   |
| N(3)-C(12)    | 1.458(6)   |
| C(12)-C(13)   | 1.529(5)   |
| C(13)-O(1)    | 1.430(5)   |
| O(1)-H(1)     | 0.8400     |
| N(1')-C(1')   | 1.161(11)  |
| C(1)-C(3')    | 1.429(10)  |
| N(2')-C(2')   | 1.136(10)  |
| C(2)-C(3')    | 1.440(10)  |
| C(3')-C(4')   | 1.346(10)  |
| C(4')-C(5')   | 1.424(10)  |
| C(5')-C(10')  | 1.398(11)  |
| C(5')-C(6')   | 1.399(11)  |
| C(6')-C(7')   | 1.381(10)  |
| C(13)-C(14)   | 1.399(7)   |
| C(8')-C(9')   | 1.382(9)   |
| C(8')-N(3')   | 1.478(11)  |
| C(9')-C(10')  | 1.371(10)  |
| N(3')-C(12')  | 1.455(9)   |
| N(3')-C(11')  | 1.474(10)  |
| C(12')-C(13') | 1.517(6)   |
| C(13')-O(1')  | 1.425(6)   |
| O(1)-H(1')    | 0.8400     |
| N(3C)-C(12C)  | 1.454(11)  |
| N(3C)-C(11C)  | 1.457(12)  |
| C(12C)-C(13C) | 1.518(12)  |
| C(13C)-O(1C)  | 1.415(13)  |
| O(1C)-H(1C)   | 0.8400     |

**Table S3.** Torsion angles ( $^{\circ}$ ) for **HEMABM**

| Bond                       | Angles( $^{\circ}$ ) |
|----------------------------|----------------------|
| C(2)-C(3)-C(4)-C(5)        | 179.7(16)            |
| C(3)-C(4)-C(4)-C(6)        | 2(3)                 |
| C(3)-C(4)-C(5)-C(10)       | -177.6(16)           |
| C(10)-C(5)-C(6)-C(7)       | -1(2)                |
| C(4)-C(5)-C(6)-C(7)        | 179.8(15)            |
| C(5)-C(6)-C(7)-C(8)        | 0.2(17)              |
| C(6)-C(7)-C(8)-N(3)        | -178.1(9)            |
| C(6)-C(7)-C(8)-C(9)        | 0.5(11)              |
| N(3)-C(8)-C(9)-C(10)       | 178.4(7)             |
| C(7)-C(8)-C(9)-C(10)       | -0.4(10)             |
| C(8)-C(9)-C(10)-C(5)       | -0.5(14)             |
| C(6)-C(5)-C(10)-C(9)       | 1(2)                 |
| C(4)-C(5)-C(10)-C(9)       | -179.6(13)           |
| C(7)-C(8)-N(3)-C(11)       | 173.0(7)             |
| C(9)-C(8)-N(3)-C(11)       | -5.7(9)              |
| C(7)-C(8)-N(3)-C(12)       | -7.7(10)             |
| C(9)-C(8)-N(3)-C(12)       | 173.7(6)             |
| C(8)-N(3)-C(12)-C(13)      | 82.9(6)              |
| C(11)-N(3)-C(12)-C(13)     | -97.7(6)             |
| N(3)-C(12)-C(13)-O(1)      | 56.8(7)              |
| C(1')-C(3')-C(4')-C(5')    | -1(4)                |
| C(2')-C(3')-C(4')-C(5')    | -177(3)              |
| C(3')-C(4')-C(5')-C(10')   | 175(3)               |
| C(3')-C(4')-C(5')-C(6')    | -6(5)                |
| C(10')-C(5')-C(6')-C(7')   | 2(3)                 |
| C(4')-C(5')-C(6')-C(7')    | -178(2)              |
| C(5')-C(6')-C(7')-C(8')    | -1(3)                |
| C(6')-C(7')-C(8')-C(9')    | -1.6(18)             |
| C(6')-C(7')-C(8')-N(3')    | 173.9(14)            |
| C(7')-C(8')-C(9')-C(10')   | 3.4(17)              |
| N(3')-C(8')-C(9')-C(10')   | -168.4(17)           |
| C(8')-C(9')-C(10')-C(5')   | -3(2)                |
| C(6')-C(5')-C(10')-C(9')   | 0(3)                 |
| C(4')-C(5')-C(10')-C(9')   | -180(2)              |
| C(9')-C(8')-N(3')-C(12')   | -4(2)                |
| C(7')-C(8')-N(3')-C(12')   | -176.7(8)            |
| C(9')-C(8')-N(3')-C(11')   | -170.9(15)           |
| C(7')-C(8')-N(3')-C(11')   | 16.5(17)             |
| C(11')-N(3')-C(12')-C(13') | 94.5(10)             |
| C(8')-N(3')-C(12')-C(13')  | -75.4(10)            |
| N(3')-C(12')-C(13')-O(1')  | -57.7(8)             |
| C(11')-N(3C)-C(12C)-C(13C) | -97.8(14)            |
| N(3C)-C(12C)-C(13C)-O(1C)  | 59.1(15)             |

All torsion angles follow the convention defined by Allen & Rogers (Allen, F.H. & Rogers, D. (1969) *Acta Cryst.* **B25**, 1326-1330)

**Table S4.** Optoelectronic properties for HEMABM

|                                                  |         |
|--------------------------------------------------|---------|
| Oxidation Potential (eV)                         | 1.5999  |
| Reduction Potential (eV)                         | -1.3213 |
| Hole Reorganization Energy (eV)                  | 0.4150  |
| Electron Reorganization Energy (eV)              | 0.5783  |
| Triplet Energy (eV)                              | 2.1130  |
| Lmax (nm)                                        | 390     |
| E <sub>max</sub> (nm)                            | 735     |
| Stokes Shift                                     | 345     |
| Triplet Stabilization Energy (eV)                | 0.2896  |
| Hole Extraction Potential (eV)                   | 7.0036  |
| Electron Extraction Potential (eV)               | -1.1959 |
| Scaled HOMO (eV)                                 | -6.1299 |
| Scaled LUMO (eV)                                 | -3.2087 |
| Electron Small Polaron Stabilization Energy (eV) | 0.3222  |
| Hole Small Polaron Stabilization Energy (eV)     | 0.2766  |
| Triplet Reorganization Energy (eV)               | 0.5661  |
| T1 Vertical Emission (eV)                        | 1.8223  |
| T1 Vertical Absorption (eV)                      | 2.3884  |
| T1 Raw Triplet Energy (eV)                       | 2.0988  |
| S1-T1 Gap (eV)                                   | 1.4291  |
| S1-T2 Gap (eV)                                   | 0.1397  |
| S1-T3 Gap (eV)                                   | -0.2758 |
| Dipole (D)                                       | 9.3701  |

**Table S5.** Second order perturbation theory analysis of Fock matrix in NBO basis for **HEMABM**

| <b>Donor(i)</b>   | <b>Type</b> | <b>Acceptor NBO (j)</b> | <b>Type</b> | <b>E2 (kcal mol<sup>-1</sup>)</b> |
|-------------------|-------------|-------------------------|-------------|-----------------------------------|
| LP (1) N2         | Lone pair   | BD*(1) O1 – H1(O)       | $\sigma^*$  | 6.00                              |
| LP (1) C8         | Lone pair   | BD*(2) C3 - C4          | $\pi^*$     | 0.74                              |
| BD (1) O1 – H1(O) | $\sigma$    | BD*(1) N2 – C2          | $\pi^*$     | 0.33                              |
